# Supplementary material
Source: PubMed Central journal article supplement (PMC8775362)
Supplement: NIHMS1768068-supplement-Supplementary_Material__1_.pdf [file NIHMS1768068-supplement-Supplementary_Material__1_.pdf]

## **Supporting Information**

### **Fluorine-18 Labeling of the MDM2 Inhibitor RG7388 for PET Imaging: Chemistry and Preliminary Evaluation**

Zhengyuan Zhou<sup>1</sup>, Michael R. Zalutsky<sup>1</sup>, Satish K. Chitneni<sup>1\*</sup>

<sup>1</sup>Department of Radiology, Duke University Medical Center, Durham, NC 27710, USA

\*E-mail: [satish.chitneni@duke.edu](mailto:satish.chitneni@duke.edu)

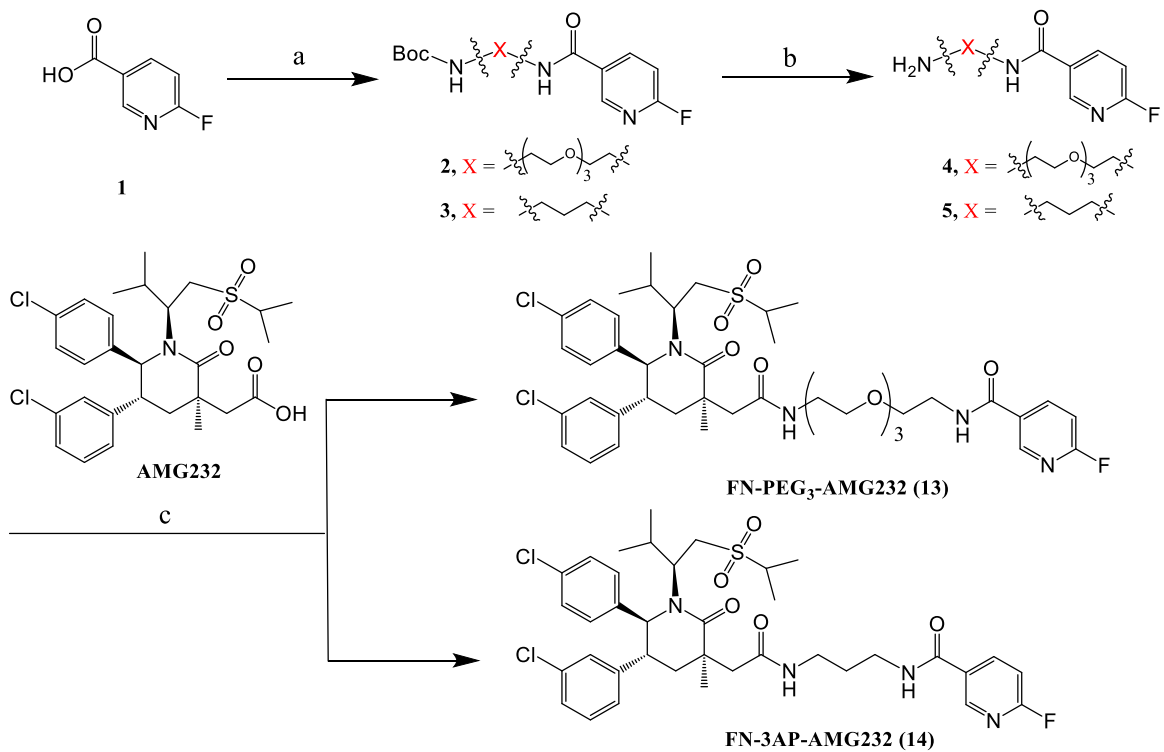

a) HATU, DIEA, DMF, Boc-NH-PEG<sub>3</sub>-NH<sub>2</sub> or N-Boc-1,3-propanediamine b) TFA c) HATU, DIEA, DMF

**Scheme S1.** Synthesis of FN-X-AMG232

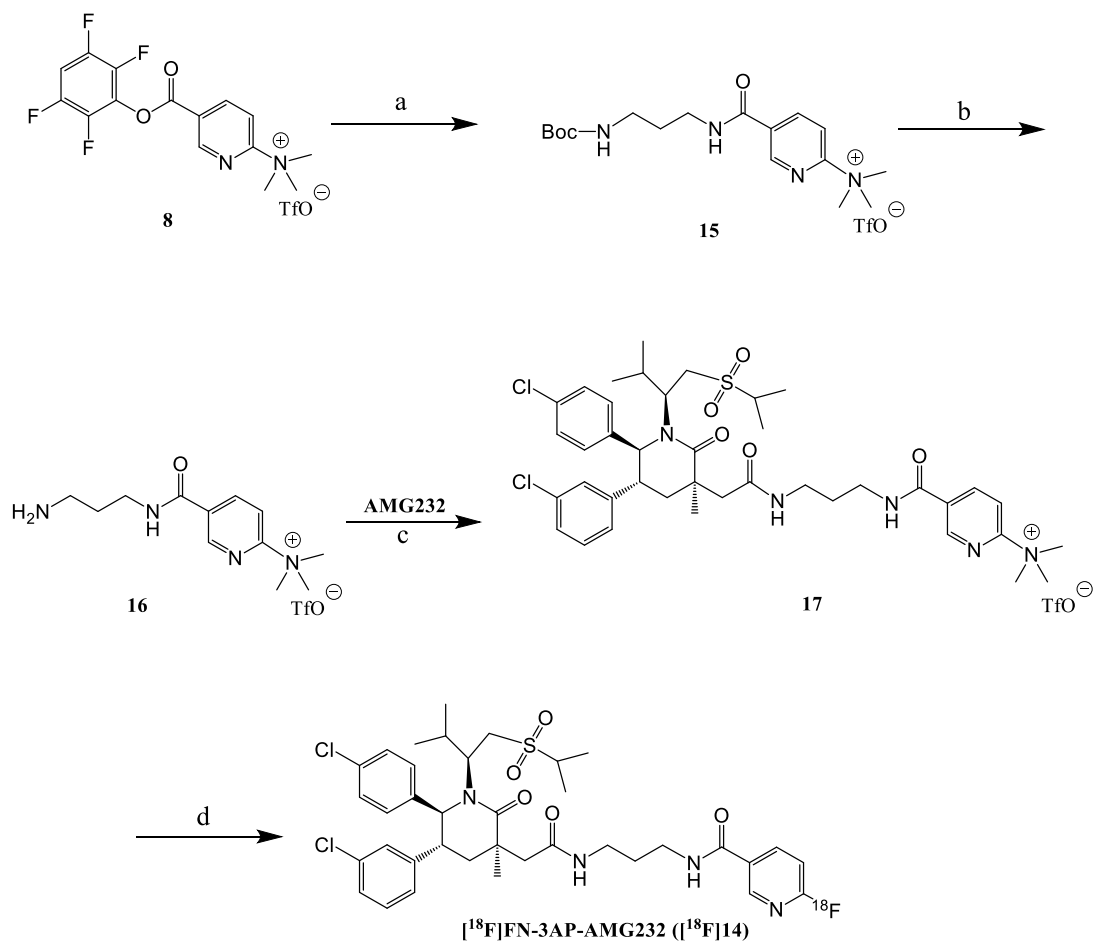

a) DIEA, DMF, N-Boc-1,3-propanediamine b) TFA c) HATU, DIEA, DMF d)  $[^{18}\text{F}]\text{TEAF}$ ,  $\text{CH}_3\text{CN}$

**Scheme S2.** Synthesis of  $[^{18}\text{F}]\text{FN-3AP-AMG232}$

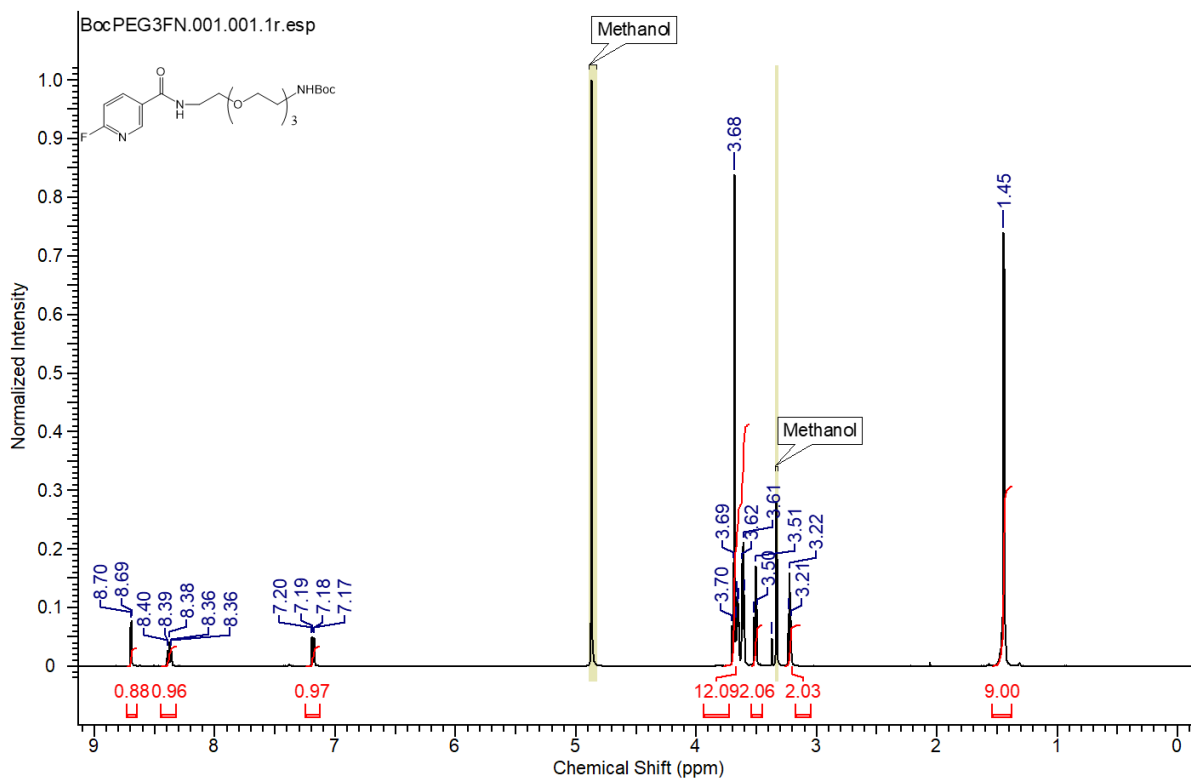

Figure S1. <sup>1</sup>H-NMR (500MHz, CD<sub>3</sub>OD) spectrum of compound 2.

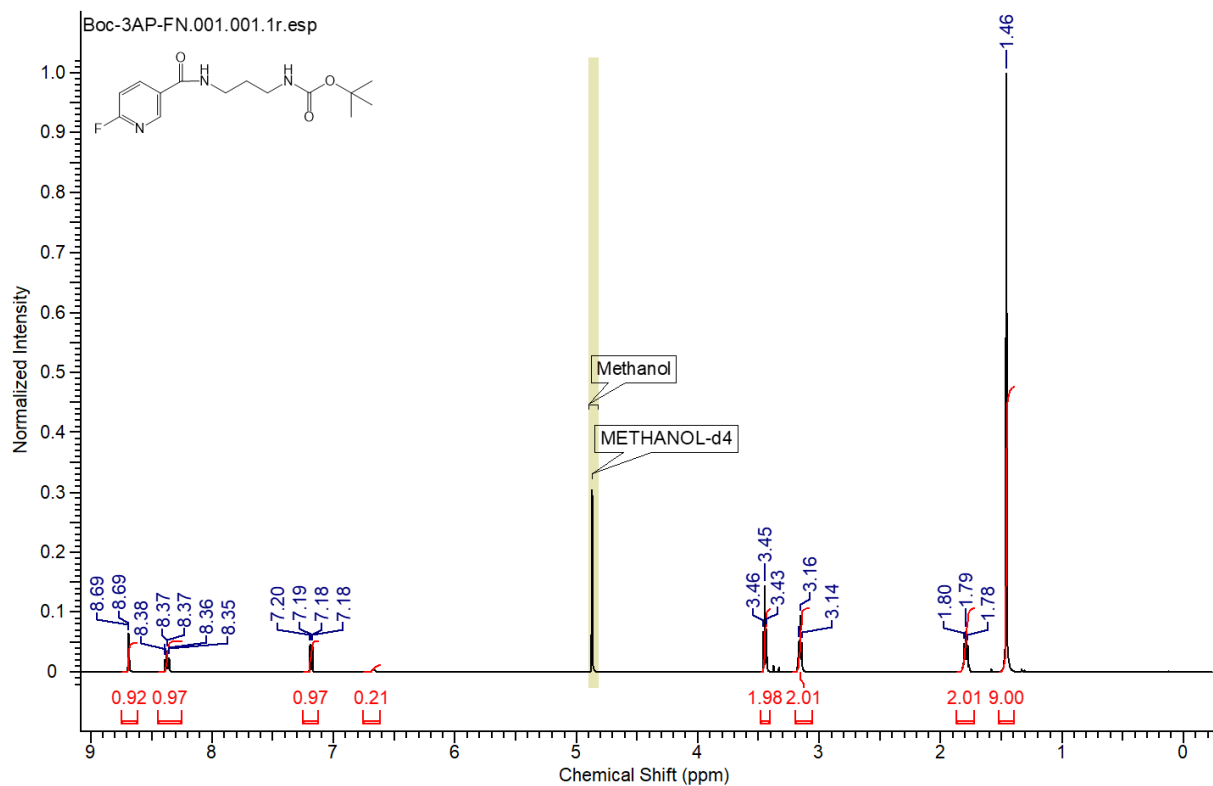

Figure S2.  $^1\text{H-NMR}$  (500MHz,  $\text{D}_2\text{O}$ ) spectrum of compound **3**.

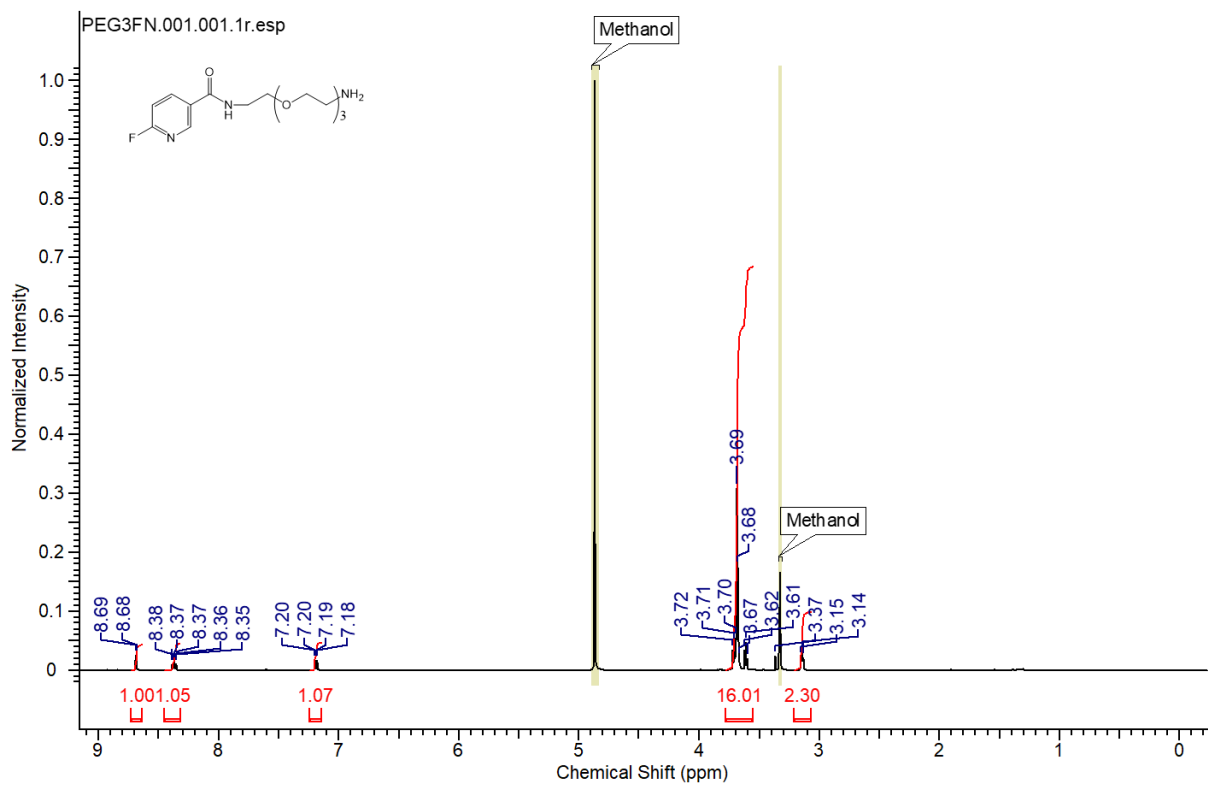

Figure S3. <sup>1</sup>H-NMR (500MHz, D<sub>2</sub>O) spectrum of compound 4.

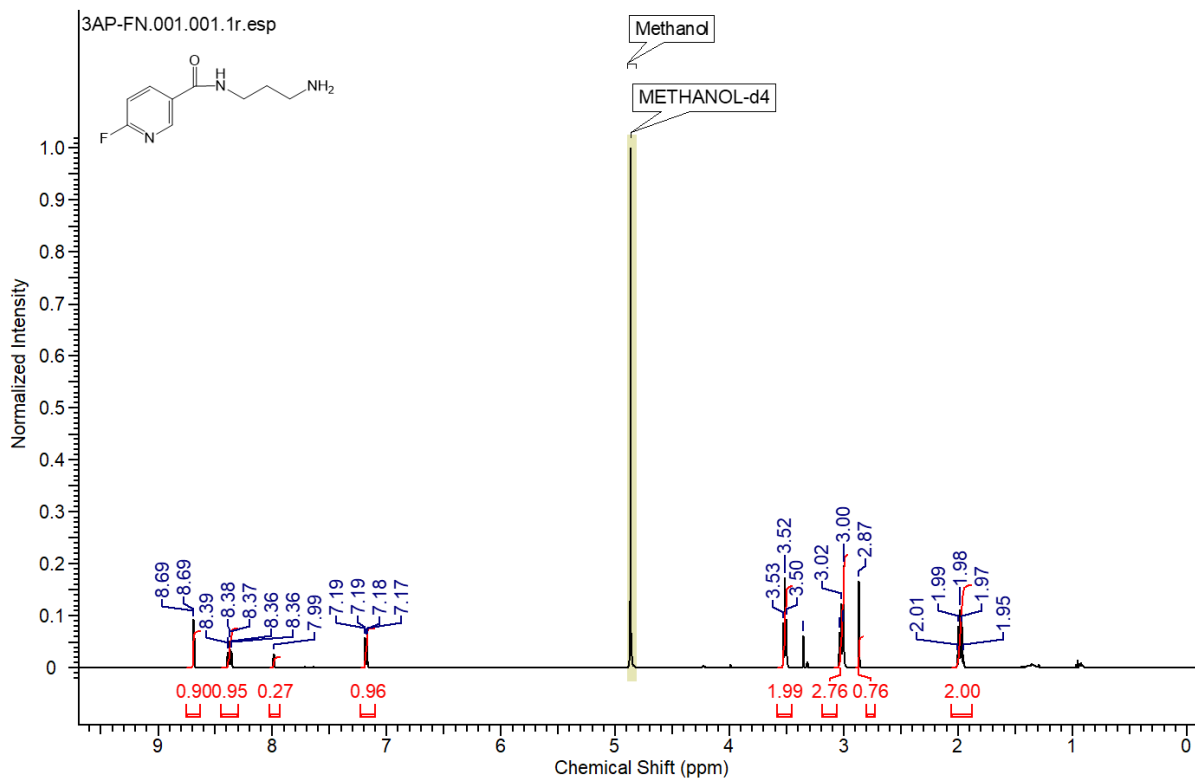

Figure S4. <sup>1</sup>H-NMR (500MHz, D<sub>2</sub>O) spectrum of compound 5.

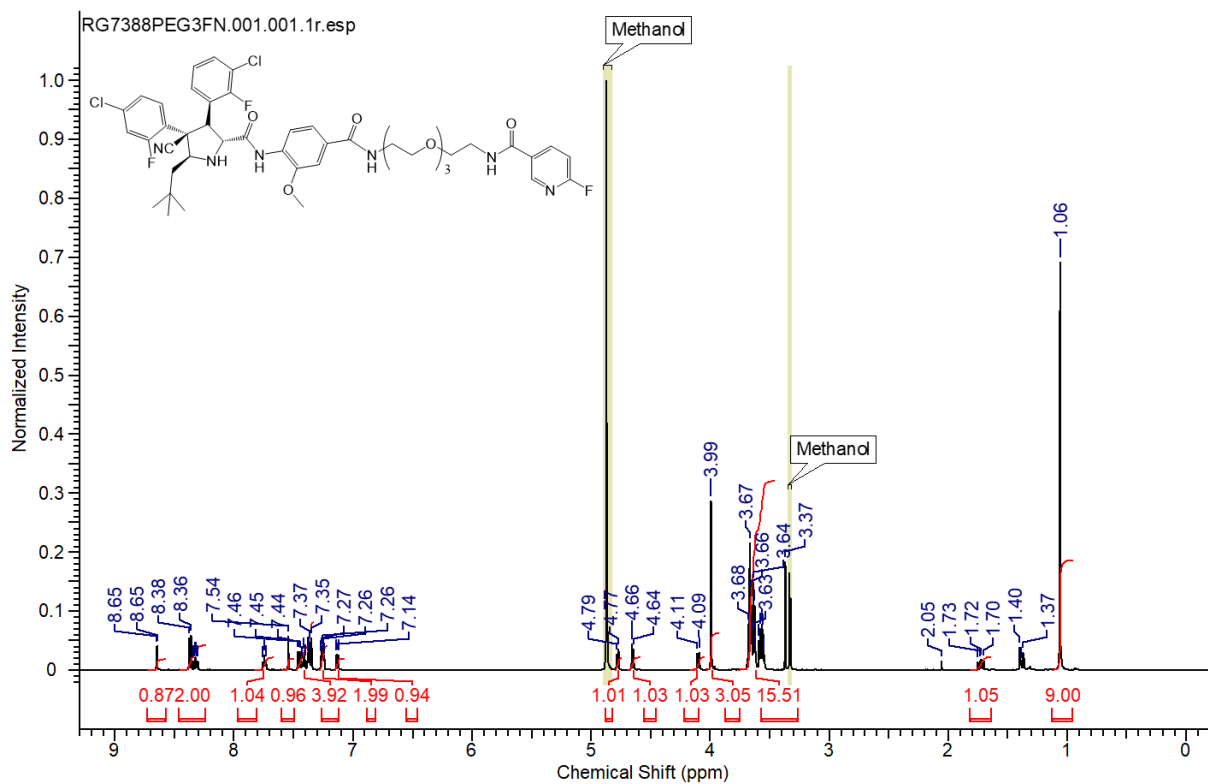

Figure S5.  $^1\text{H-NMR}$  (500MHz,  $\text{CD}_3\text{OD}$ ) spectrum of compound **6**.



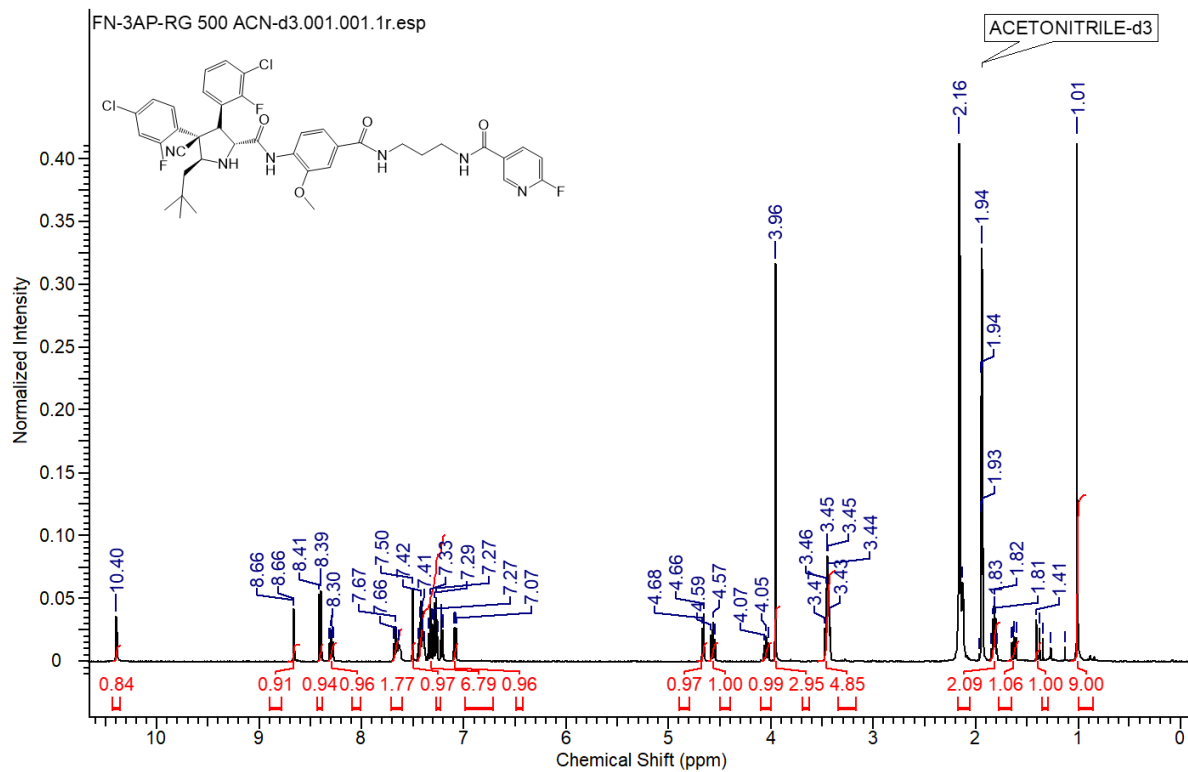

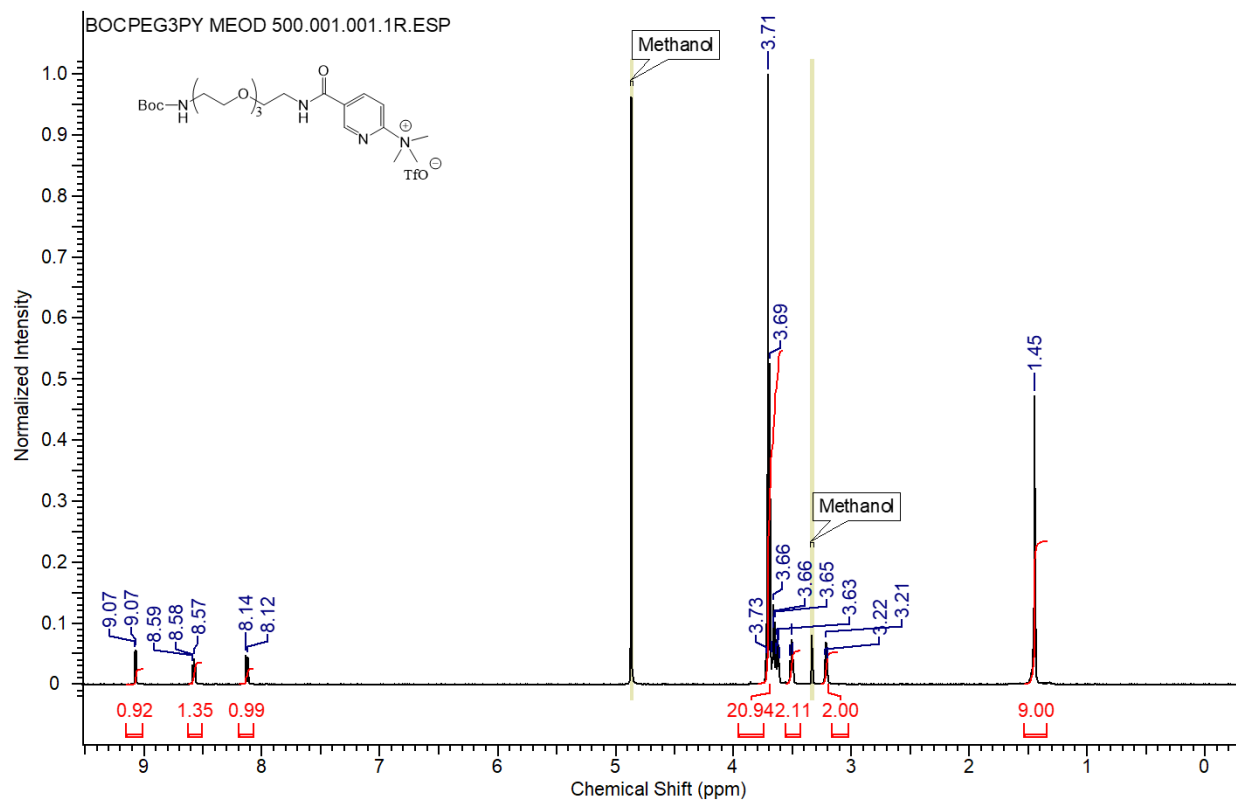

Figure S7. <sup>1</sup>H-NMR (500MHz, CD<sub>3</sub>OD) spectrum of compound **9**.

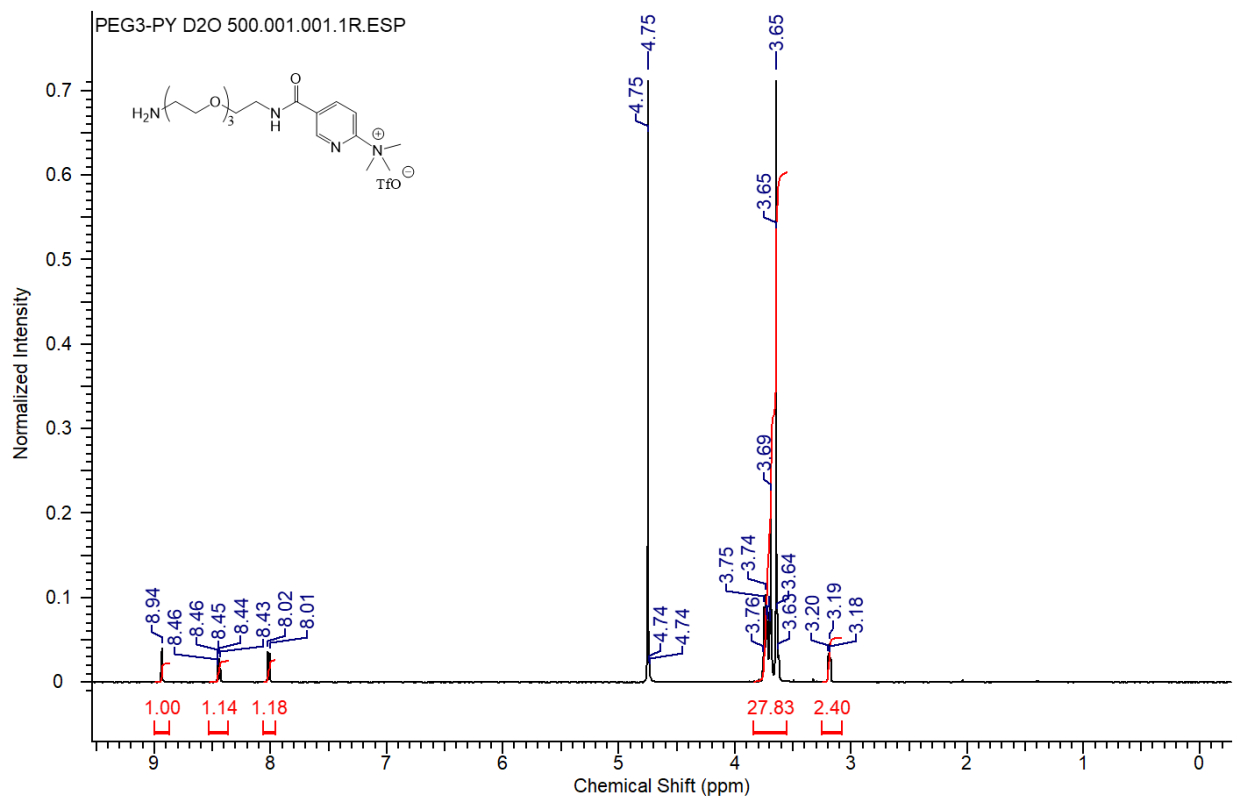

Figure S8.  $^1\text{H-NMR}$  (500MHz,  $\text{D}_2\text{O}$ ) spectrum of compound 10.

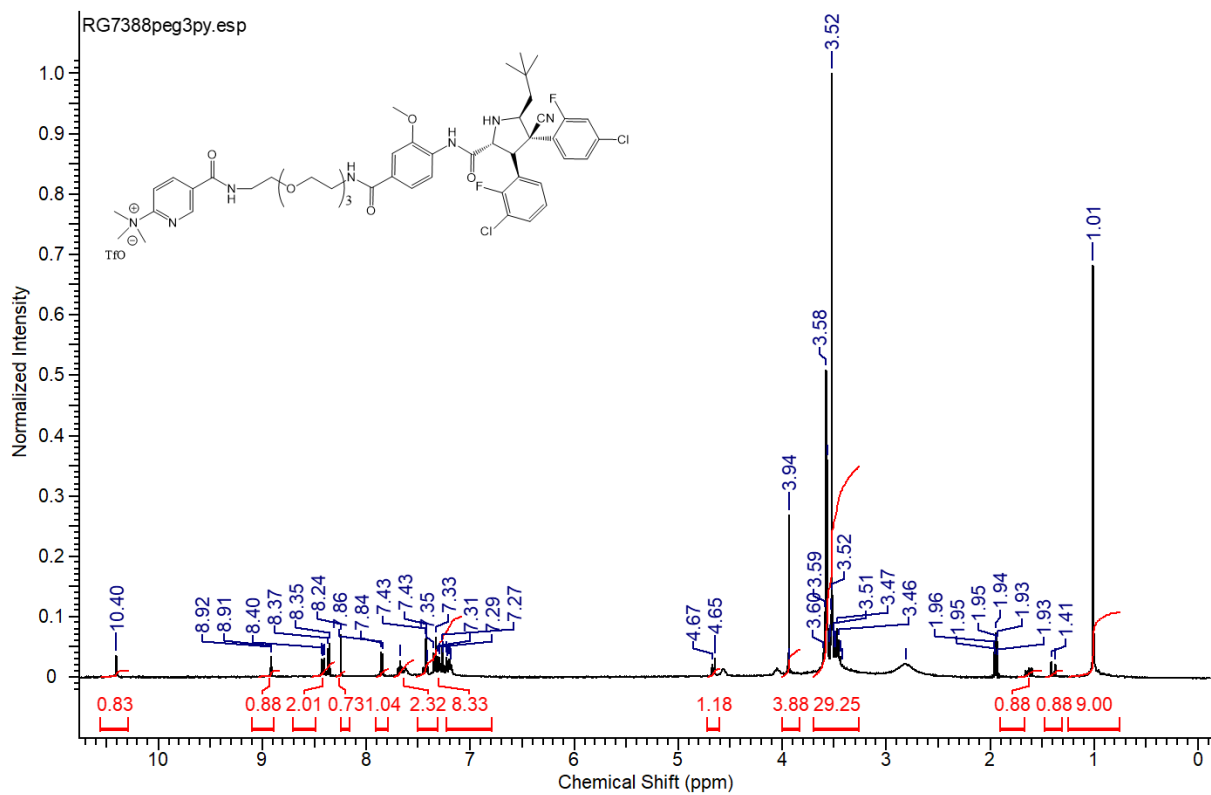

Figure S9.  $^1\text{H-NMR}$  (500MHz,  $\text{CD}_3\text{CN}$ ) spectrum of compound 11.

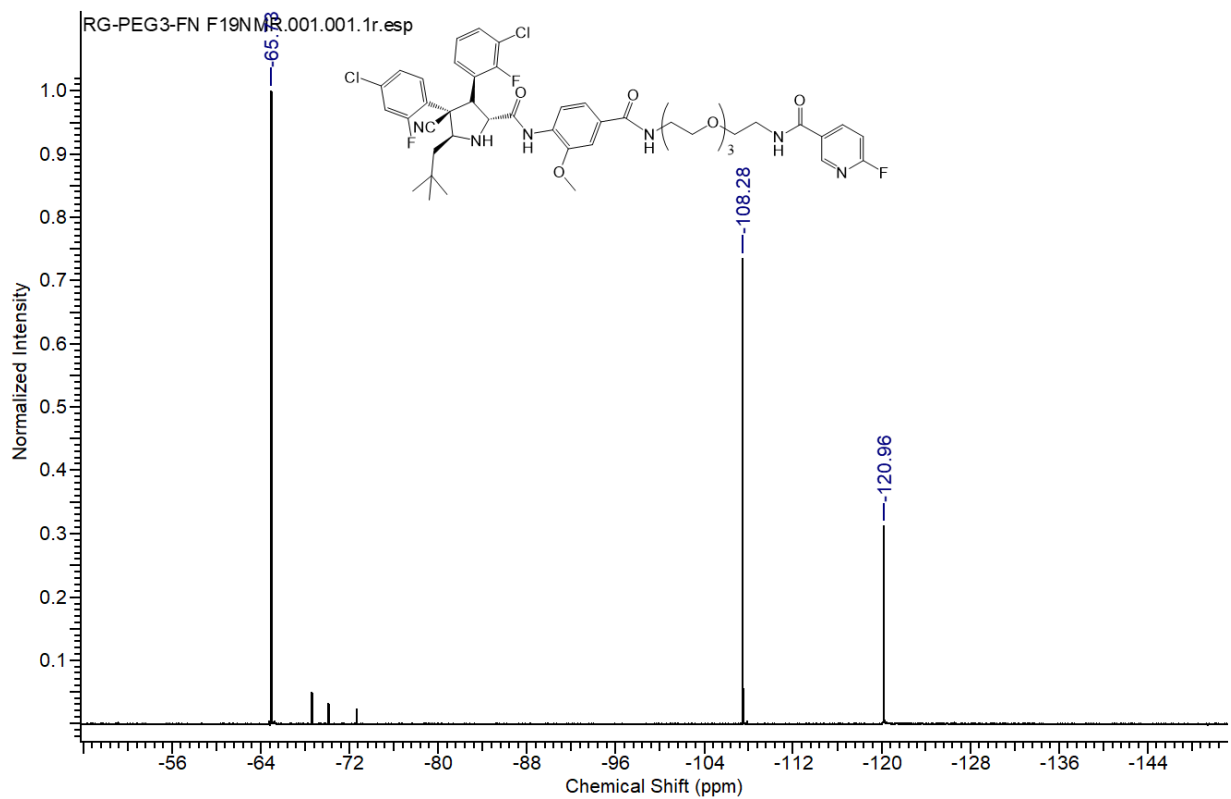

**Figure S10.**  $^{19}\text{F}$ -NMR (471MHz,  $\text{DMSO-d}_6$ ) spectrum of compound **6**.

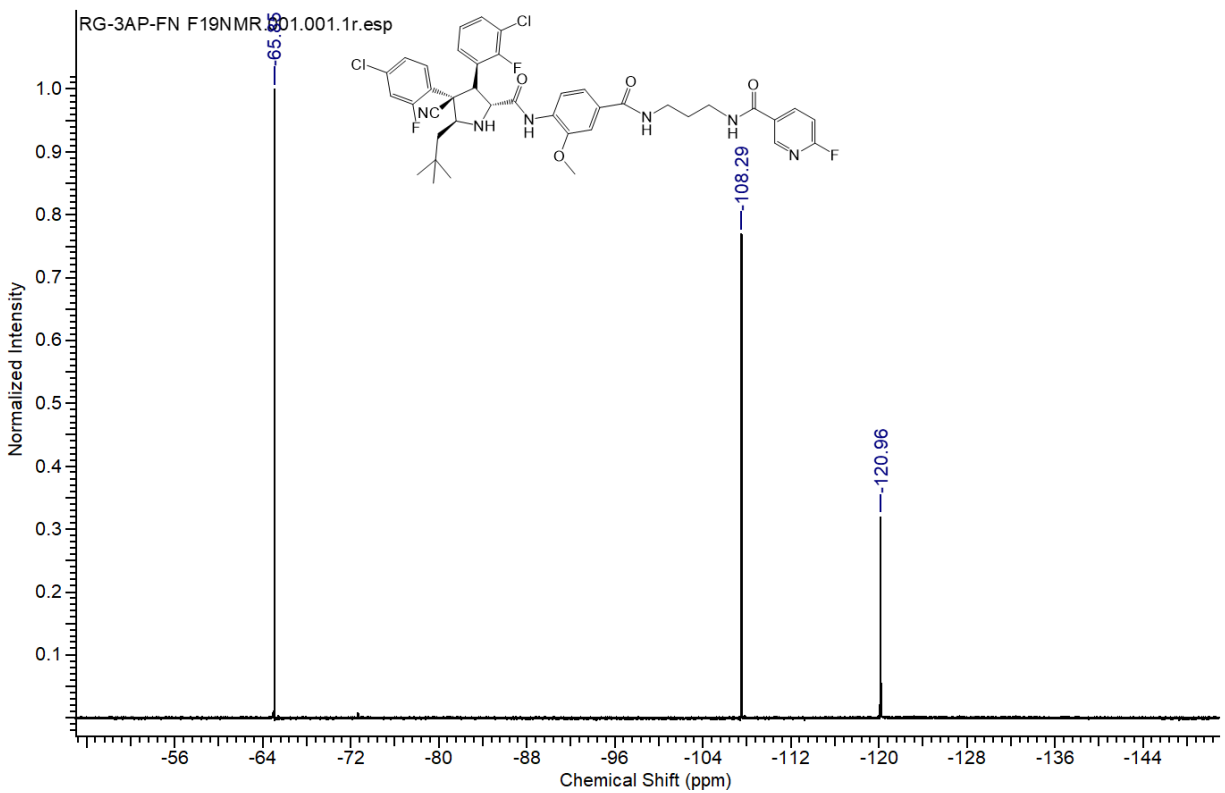

Figure S11.  $^{19}\text{F}$ -NMR (471MHz,  $\text{DMSO-d}_6$ ) spectrum of compound 7.

### Synthesis of FN-PEG<sub>3</sub>-AMG232 (**13**)

Compound **4** (11.1 mg, 35.3  $\mu$ mol), AMG232 (20 mg, 35.3  $\mu$ mol), HATU (20 mg, 53.0  $\mu$ mol) and *N,N*-diisopropylethylamine (8.7 mg, 70.6  $\mu$ mol) were taken in 0.3 mL DMF and the mixture was stirred at RT (25°C) for 2 h. The crude mixture was then subjected to semi-preparative HPLC using an Agilent Zorbax SB-C18 (9.4  $\times$  250 mm, 5  $\mu$ m) reversed-phase column and eluted with a gradient consisting of 0.1% formic acid in both water (solvent A) and acetonitrile (solvent B) at a flow rate of 4 mL/min; the proportion of B was linearly increased from 25% to 70% over 15 min. Lyophilization of pooled HPLC fractions containing **13** ( $t_R$  = 13.7 min) rendered 25.7 mg (29.7  $\mu$ mol, 84.2%) as a colorless oil: <sup>1</sup>H-NMR (CD<sub>3</sub>CN, 500 MHz)  $\delta_H$  = 0.46 (d,  $J$  = 6.87 Hz, 3H), 0.59 (d,  $J$  = 6.56 Hz, 3H), 1.26 (s, 3H), 1.35 (dd,  $J$  = 6.79, 1.14 Hz, 6H), 2.0-2.1 (m, 1H), 2.1-2.2 (m, 2H), 2.41 (d,  $J$  = 13.6 Hz, 2H), 2.75-2.85 (d,  $J$  = 13.6 Hz, 1H), 2.98 (d,  $J$  = 13.58 Hz, 1H), 3.10-3.25 (m, 2H), 3.3-3.4 (m, 2H), 3.4-3.7 (m, 15H), 3.90 (dd,  $J$  = 13.89, 10.83 Hz, 1H), 5.05 (d,  $J$  = 11.14 Hz, 1H), 6.88 (t,  $J$  = 5.26 Hz, 1H), 6.97 (d,  $J$  = 7.5 Hz, 1H), 7.02 (s, 1H), 7.05-7.20 (m, 3.25), 8.27 (td,  $J$  = 8.16, 2.44 Hz, 1H), 8.63 (d,  $J$  = 2.29 Hz, 1H). <sup>19</sup>F-NMR (DMSO-d<sub>6</sub>, 471 MHz)  $\delta$  ppm = -65.71(s). LRMS (LC/MS-ESI)  $m/z$ : 865.4 (M+H)<sup>+</sup>. HRMS (ESI,  $m/z$ ): calcd for C<sub>42</sub>H<sub>55</sub>Cl<sub>2</sub>FN<sub>4</sub>O<sub>8</sub>S (M+H)<sup>+</sup>: 865.3175; found: 865.3166.

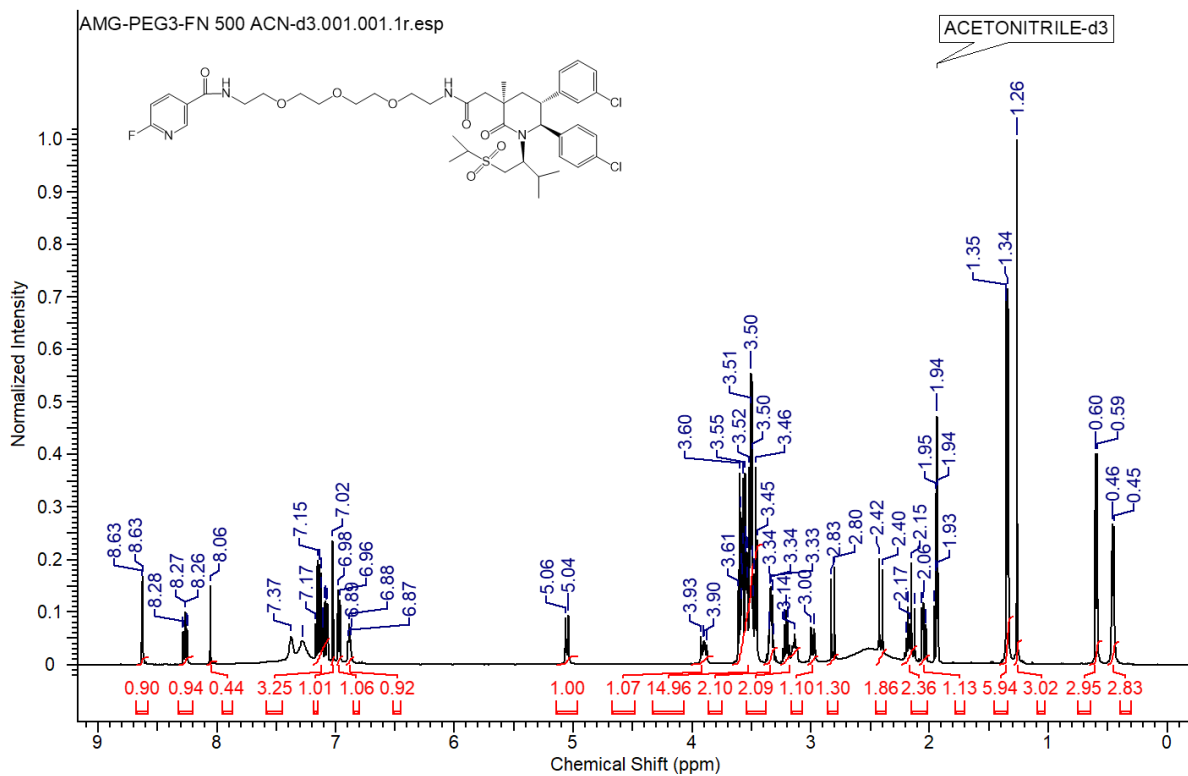

Figure S12. <sup>1</sup>H-NMR (500MHz, CD<sub>3</sub>CN) spectrum of compound 13.



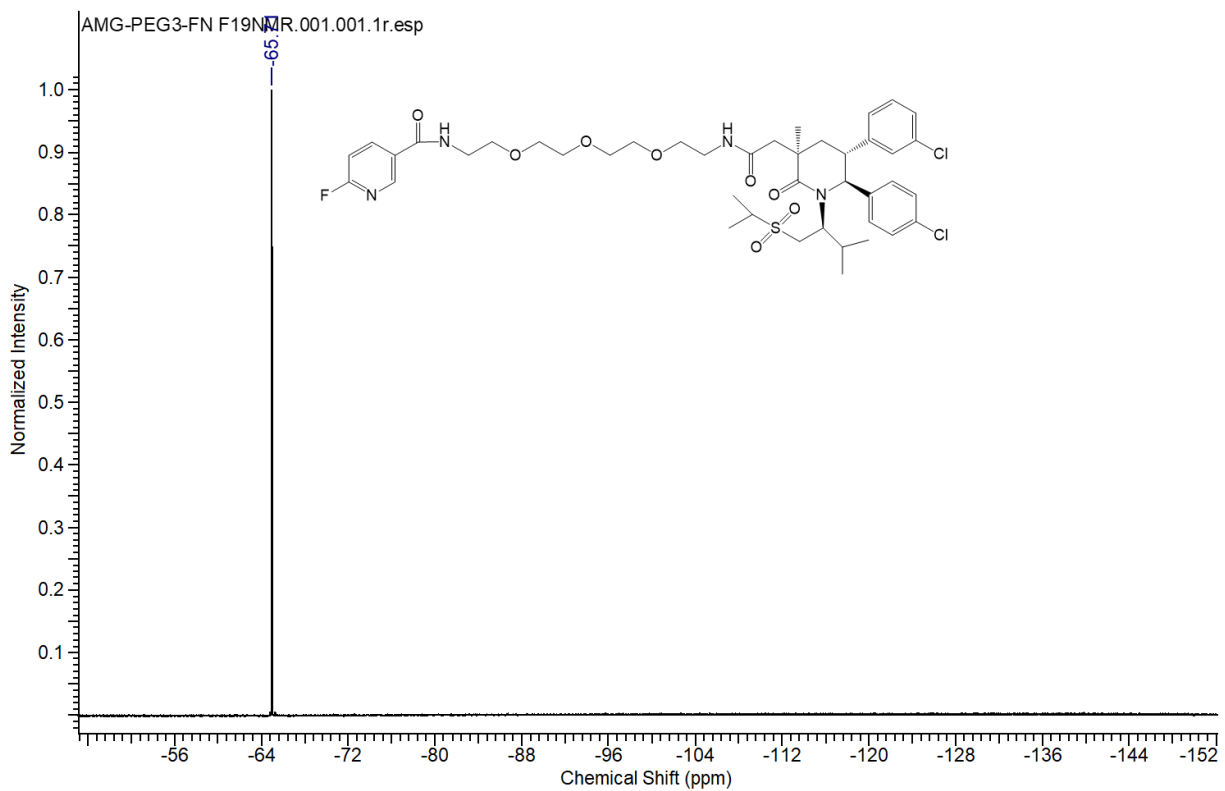

### Synthesis of FN-3AP-AM232 (**14**)

Compound **5** (3 mg, 10.0  $\mu$ mol), RG7388 (5.6 mg, 10.0  $\mu$ mol), HATU (6.5 mg, 17  $\mu$ mol) and *N,N*-diisopropylethylamine (2.5 mg, 20  $\mu$ mol) were taken in 0.2 mL DMF and the mixture was stirred at RT for 2 h. The crude mixture subsequently was purified by semi-preparative HPLC as described above, with a gradient consisting of 0.1% formic acid in both water (solvent A) and acetonitrile (solvent B); the proportion of B was linearly increased from 40% to 80% over 15 min. Lyophilization of pooled HPLC fractions containing **14** ( $t_R$  = 14.2 min) rendered 3.76 mg (5.0  $\mu$ mol, 52.1%) as a colorless oil:  $^1\text{H NMR}$  ( $\text{CD}_3\text{CN}$ , 500 MHz)  $\delta_{\text{H}}$  = 0.46 (d,  $J$  = 6.87 Hz, 3H), 0.60 (d,  $J$  = 6.71 Hz, 3H), 1.2-1.4 (m, 10H), 1.6-1.8 (m, 2H), 2.43 (d,  $J$  = 13.58 Hz, 1H), 2.75-2.85 (m, 1H), 2.99 (d,  $J$  = 13.73 Hz, 1H), 3.10-3.60 (m, 7H), 3.8-4.0 (m, 1H), 5.05 (d,  $J$  = 10.99 Hz, 1H), 6.9-7.2 (m, 7H), 7.63 (s, 1H), 8.27 (td,  $J$  = 8.13, 2.52 Hz, 1H), 8.65 (d,  $J$  = 2.29 Hz, 1H). LRMS (LC/MS-ESI)  $m/z$ : 747.3 (M+H)<sup>+</sup>. HRMS (ESI,  $m/z$ ): calcd for  $\text{C}_{37}\text{H}_{45}\text{Cl}_2\text{FN}_4\text{O}_5\text{S}$  (M+H)<sup>+</sup>:747.2528; found:747.2562.

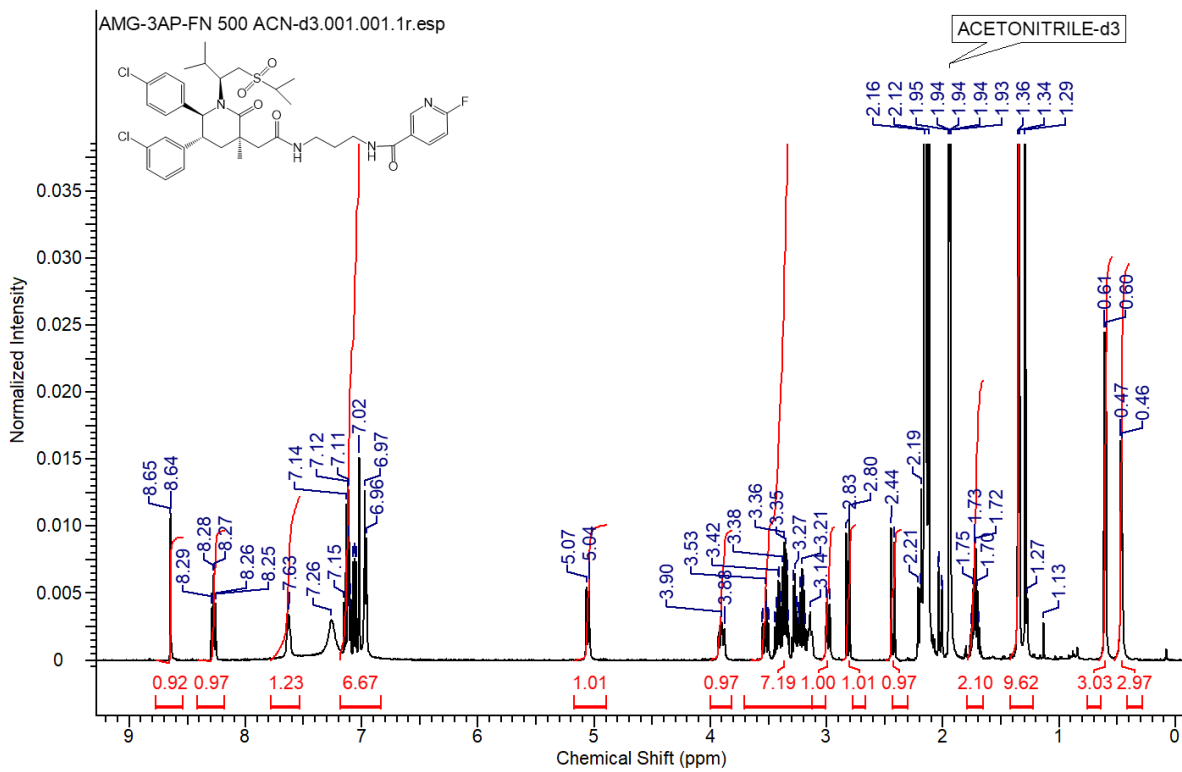

*5-((3-((tert-butoxycarbonyl)amino)propyl)carbamoyl)-N,N,N-trimethylpyridin-2-aminium (15)*

A mixture of compound **8** (12.0 mg, 25.3  $\mu\text{mol}$ ), *tert*-butyl (3-aminopropyl)carbamate (4.4 mg, 25.3  $\mu\text{mol}$ ) and *N,N*-diisopropylethylamine (6.5 mg, 50.6  $\mu\text{mol}$ ) in DMF (300  $\mu\text{L}$ ) was stirred at RT for 2 h. The product from this mixture was isolated by semi-preparative HPLC as described above, but the proportion of solvent B was linearly increased from 5% to 20% over 15 min. Under these conditions, the product eluted with a retention time ( $t_R$ ) of 7.5 min. Pooled HPLC fractions containing the product were lyophilized to obtain 4.35 mg (9.0  $\mu\text{mol}$ , 35.7%) of compound **15** as a colorless oil. LRMS (LC/MS-ESI)  $m/z$ : 337.3 ( $M^+$ ). HRMS (ESI,  $m/z$ ): calcd for  $C_{17}H_{29}N_4O_3$  ( $M^+$ ): 337.2225; found: 337.2248.

*5-((3-aminopropyl)carbamoyl)-N,N,N-trimethylpyridin-2-aminium (16)*

Compound **15** (4.35 mg, 9.0  $\mu\text{mol}$ ) was dissolved in 1 mL of TFA and stirred at RT for 30 min. Solvents were evaporated to yield 4.4 mg (98.7%, based on trifluoroacetate salt) of compound **16** as a colorless oil. LRMS (LC/MS-ESI)  $m/z$ : 237.2 ( $M^+$ ). HRMS (ESI,  $m/z$ ): calcd for  $C_{12}H_{21}N_4O$  ( $M^+$ ): 237.1715; found: 237.1752.

5-((3-(2-((3R,5R,6S)-5-(3-chlorophenyl)-6-(4-chlorophenyl)-1-((S)-1-(isopropylsulfonyl)-3-methylbutan-2-yl)-3-methyl-2-oxopiperidin-3-yl)acetamido)propyl)carbamoyl)-N,N,N-trimethylpyridin-2-aminium (**17**)

A mixture of compound **16** (4.4 mg, 9.0  $\mu$ mol), AMG232 (5.1 mg, 9.0  $\mu$ mol), HATU (5.1 mg, 13.5  $\mu$ mol) and *N,N*-diisopropylethylamine (2.3 mg, 18.0  $\mu$ mol) in DMF (0.5 mL) was stirred at RT for 1 h. The product was isolated from this mixture by semi-preparative HPLC as described above, but using a gradient wherein the proportion of solvent B was linearly increased from 15% to 70% over 15 min. Lyophilization of pooled HPLC fractions containing **17** ( $t_R$  = 11.5 min) yielded 6.28 mg (6.8  $\mu$ mol, 76.0%) of a colorless oil:  $^1\text{H NMR}$  ( $\text{CD}_3\text{CN}$ , 500 MHz)  $\delta_{\text{H}}$  = 0.47 (d,  $J$  = 6.71 Hz, 3H), 0.60 (d,  $J$  = 6.56 Hz, 3H), 1.25-1.40 (m, 10H), 1.70-1.75 (m, 2H), 2.45 (d,  $J$  = 13.43 Hz, 1H), 2.89 (d,  $J$  = 13.58 Hz, 1H), 2.99 (d,  $J$  = 13.89 Hz, 1H), 3.1-3.4 (m, 6H), 3.54 (s, 9H), 3.6-3.7 (m, 1H), 3.91 (dd,  $J$  = 13.43, 10.38 Hz, 1H), 5.04 (d,  $J$  = 10.99 Hz, 1H), 7.0-7.2 (m, 5H), 7.88 (d,  $J$  = 8.70 Hz, 1H), 8.0-8.1 (m, 1H), 8.68 (dd,  $J$  = 8.70, 2.14 Hz, 1H), 8.85-8.95 (m, 1H), 9.1-9.2 (m, 1H). LRMS (LC/MS-ESI)  $m/z$ : 786.8 ( $\text{M}^+$ ). HRMS (ESI,  $m/z$ ): calcd for  $\text{C}_{40}\text{H}_{54}\text{Cl}_2\text{N}_5\text{O}_5\text{S}$  ( $\text{M}^+$ ): 786.3217; found: 786.3240.

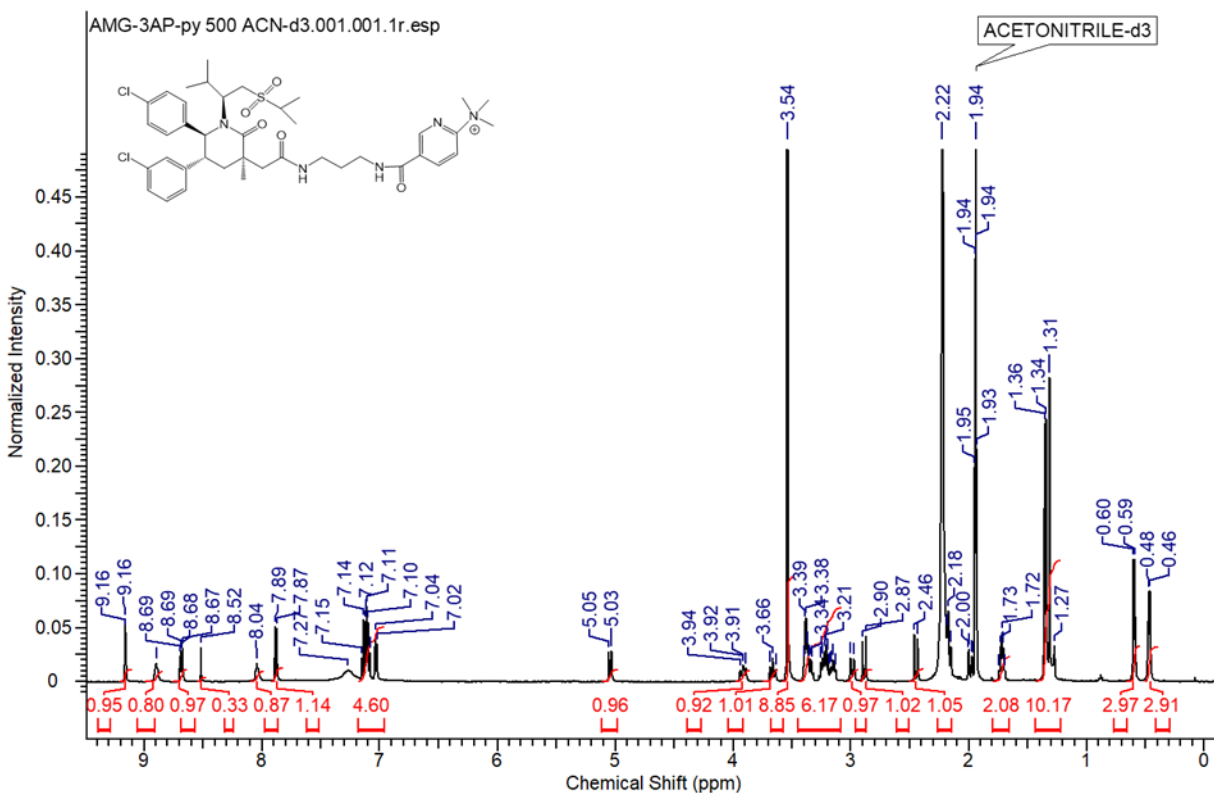

Figure S15.  $^1\text{H-NMR}$  (500MHz,  $\text{CD}_3\text{CN}$ ) spectrum of compound **17**.

### Radiosynthesis of $[^{18}\text{F}]\text{FN-3AP-AMG232}$ ( $[^{18}\text{F}]\mathbf{14}$ )

Fluorine-18 trapped on a QMA cartridge (Waters Corp, Milford, MA) was obtained from PETNET Solutions (Durham, NC). The cartridge was eluted with 1 mL of tetraethylammonium bicarbonate (3 mg/mL) in 80% acetonitrile in water. The solvents from the eluate were evaporated at  $100^\circ\text{C}$  and the residual water was removed by azeotropeing with acetonitrile ( $3 \times 0.3$  mL) at the same temperature. A solution of **17** (0.3 mg,  $0.32 \mu\text{mol}$ ) in 0.15 mL anhydrous acetonitrile was added to the dried  $^{18}\text{F}$  activity (1.9-2.6 GBq; 51-70 mCi), and the mixture heated at  $40^\circ\text{C}$  for 15 min. The resultant solution containing  $[^{18}\text{F}]\mathbf{14}$  was purified similar to  $[^{18}\text{F}]\mathbf{6}$ , using 50% ethanol in sodium acetate buffer (0.05 M, pH 5.5) at a flow rate of 1.5 mL/min ( $t_{\text{R}} = 13$  min).

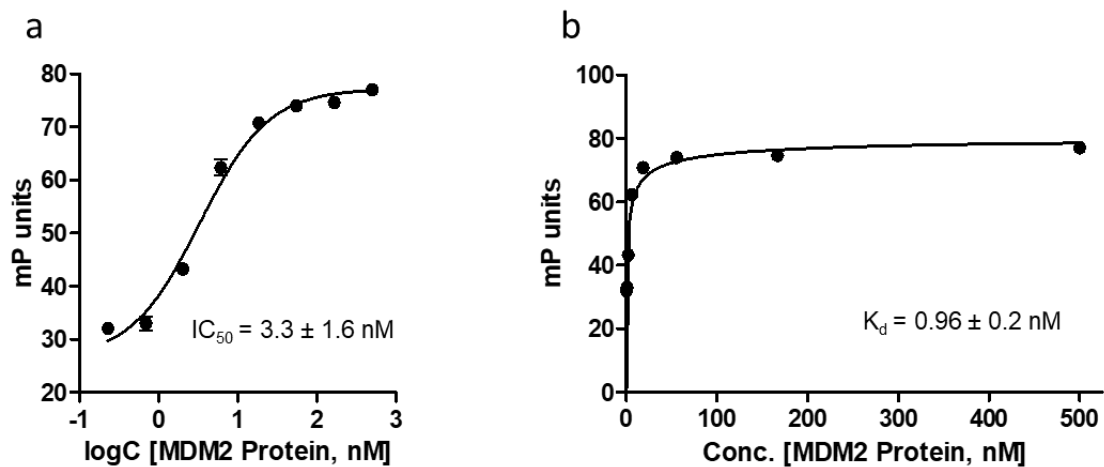

**Figure S16.** Half-maximal inhibitory concentration (IC<sub>50</sub>, a) and saturation binding curves (b) of the fluorescent labeled peptide 5-FAM-PMDM6 (1 nM) against human recombinant MDM2 protein (Novus Biologicals).

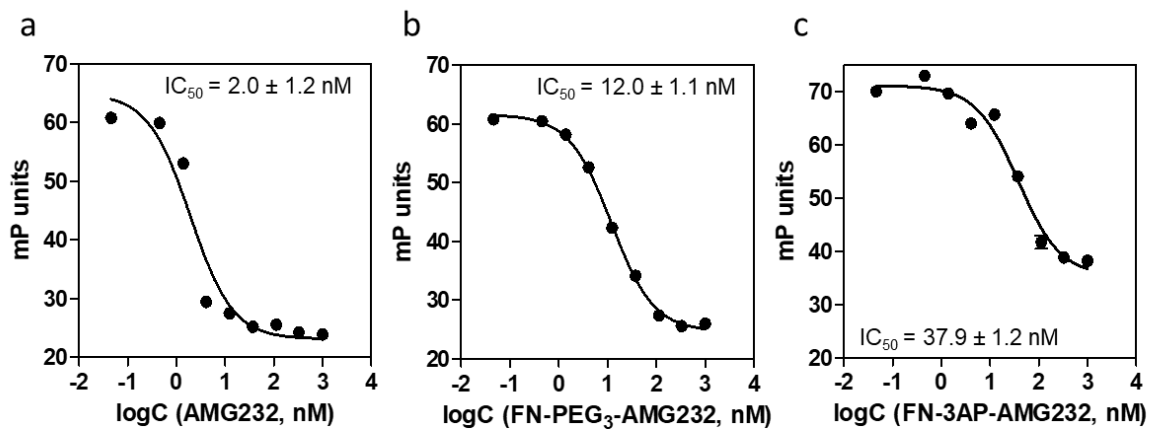

**Figure S17.** Determination of the inhibitory potency ( $IC_{50}$ ) of AMG232 (a) and its nonradioactive fluorinated analogues, **13** (b) and **14** (c) by a fluorescence polarization (FP)-based competitive binding assay.



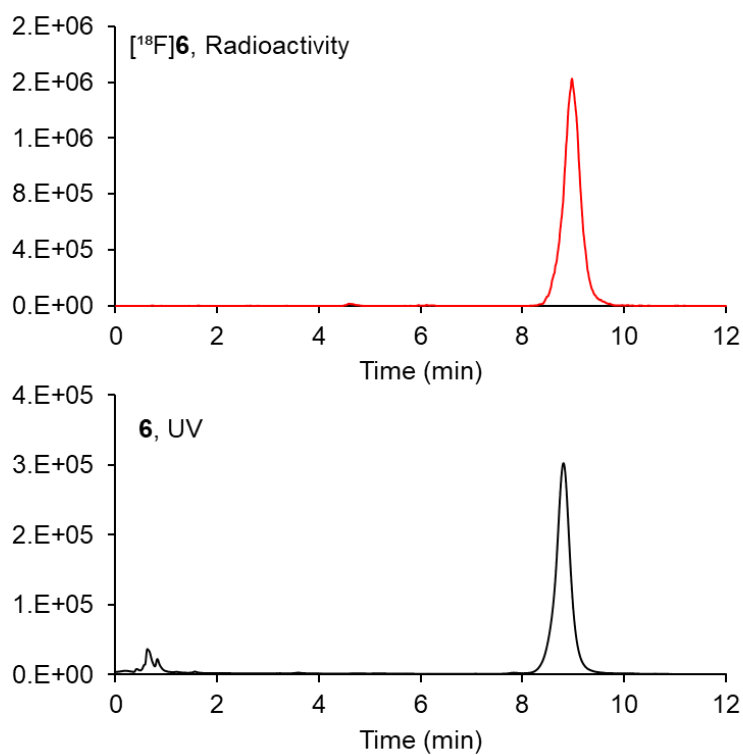

**Figure S18.** Identity confirmation of [<sup>18</sup>F]6 by comparing its retention time with the authenticated nonradioactive analogue **6** on the analytical HPLC system (Knauer, Germany) connected with a XBridge C18 column (3.5 μm, 3.0 × 100 mm; Waters) and eluted with acetonitrile and water (55:45; 0.1% TFA) at a flowrate of 1 mL per minute. Retention times: [<sup>18</sup>F]6 (Radioactivity) = 9.0 min, **6** (UV) = 8.8 min. Y-axis represents response in microvolts (μV).

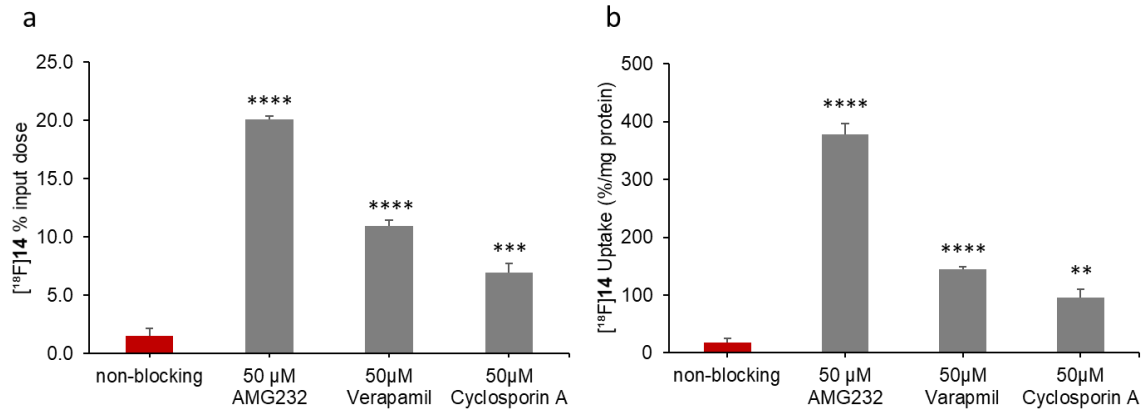

**Figure S19.** Uptake of [<sup>18</sup>F]14 in SJSA-1 tumor cells. Cells were incubated with [<sup>18</sup>F]14 alone (non-blocking) or with 50 μM of AMG232, Verapamil or Cyclosporin for 1 h. a) Cell uptake data presented as % input dose of [<sup>18</sup>F]14; b) Cell uptake data presented as % uptake per mg protein. Data are shown as mean ± SD for triplicates. \*\**p* ≤ 0.01, \*\*\**p* ≤ 0.001, \*\*\*\**p* ≤ 0.0001 vs. no co-incubation (0 μM).

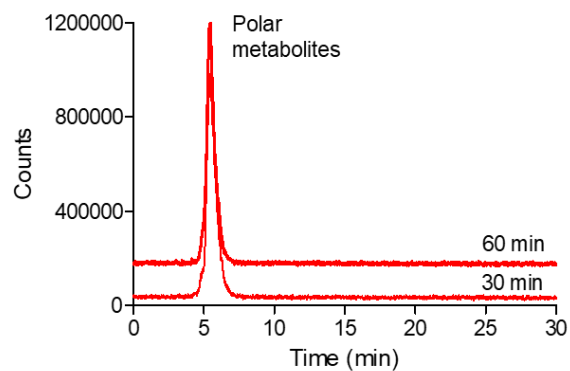

**Figure S20.** Radioactivity profiles (HPLC) of the urine samples collected from mice at 30 or 60 min post-injection (i.v.) of [ $^{18}\text{F}$ ]**6**, showing polar labeled metabolite peaks ( $t_{\text{R}} = 5.5$  min). No intact tracer ( $t_{\text{R}} = 20.4$  min) was detected in the urine at either of the two time points.
